# Supplementary figures and images for: Molecular Profiling of Spermatozoa Reveals Correlations between Morphology and Gene Expression: A Novel Biomarker Panel for Male Infertility
Source: Hindawi journal article supplement (doi:10.1155/2021/1434546), 2021-01-01

Supplementary Figure S1

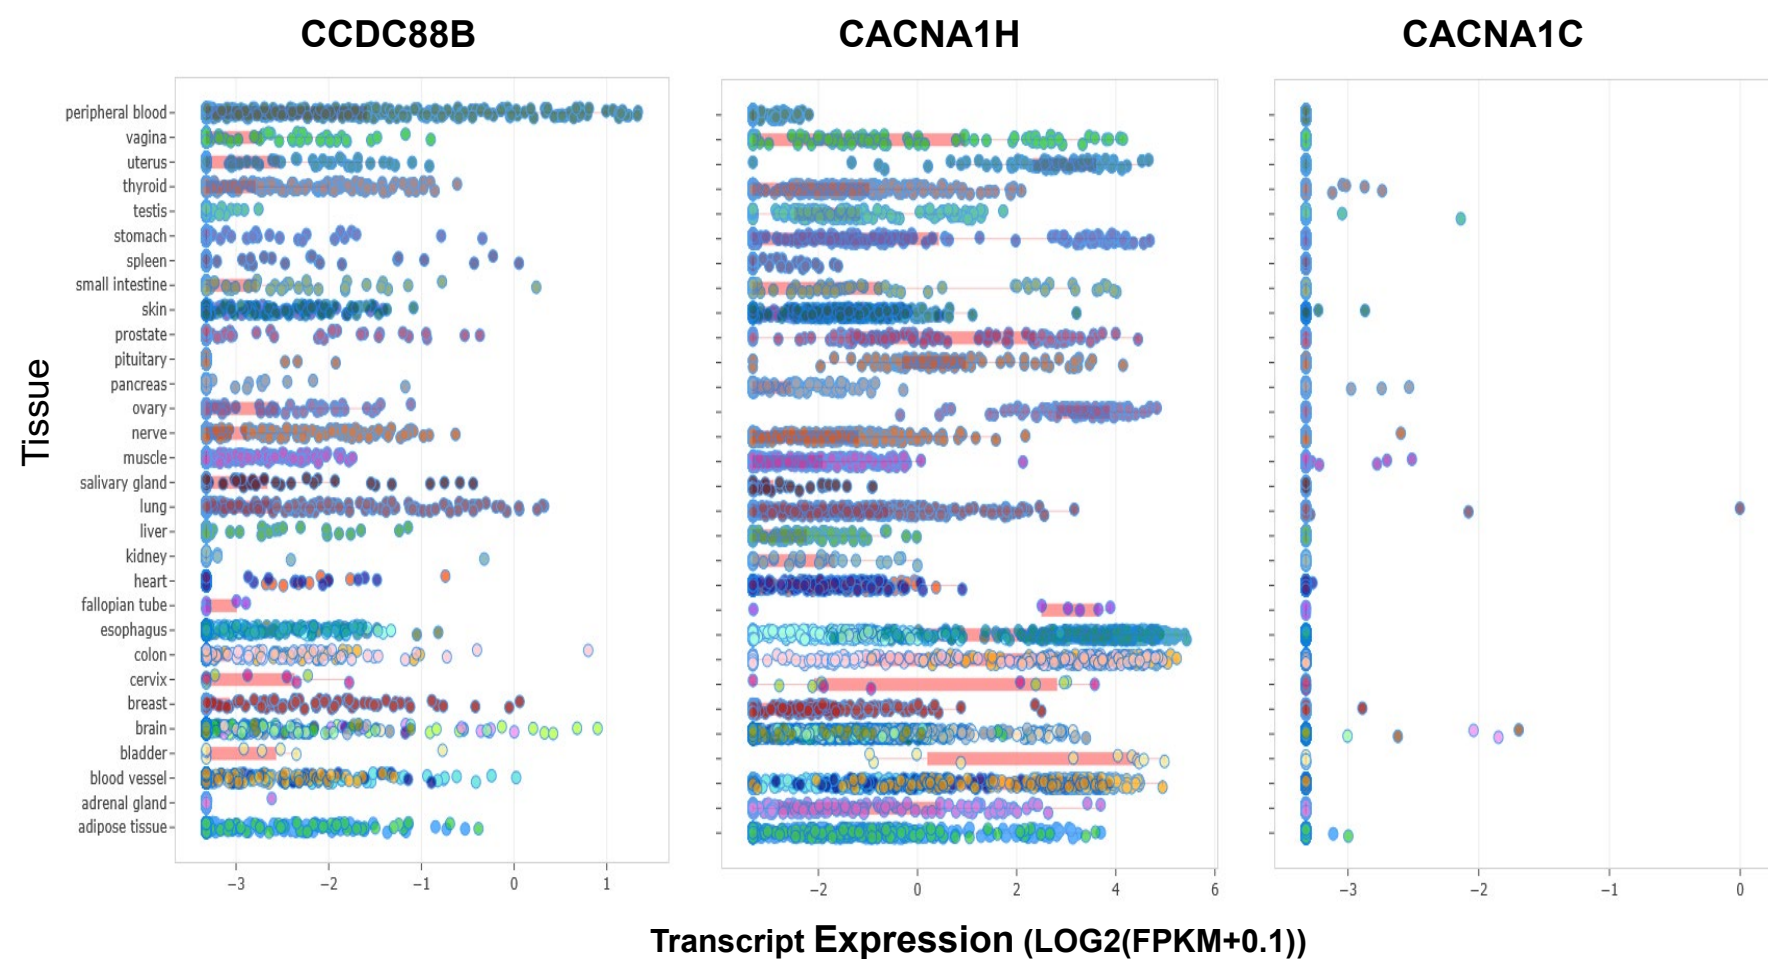

Supplement: f1 [file 1434546.f1.zip]

**Figure S2**

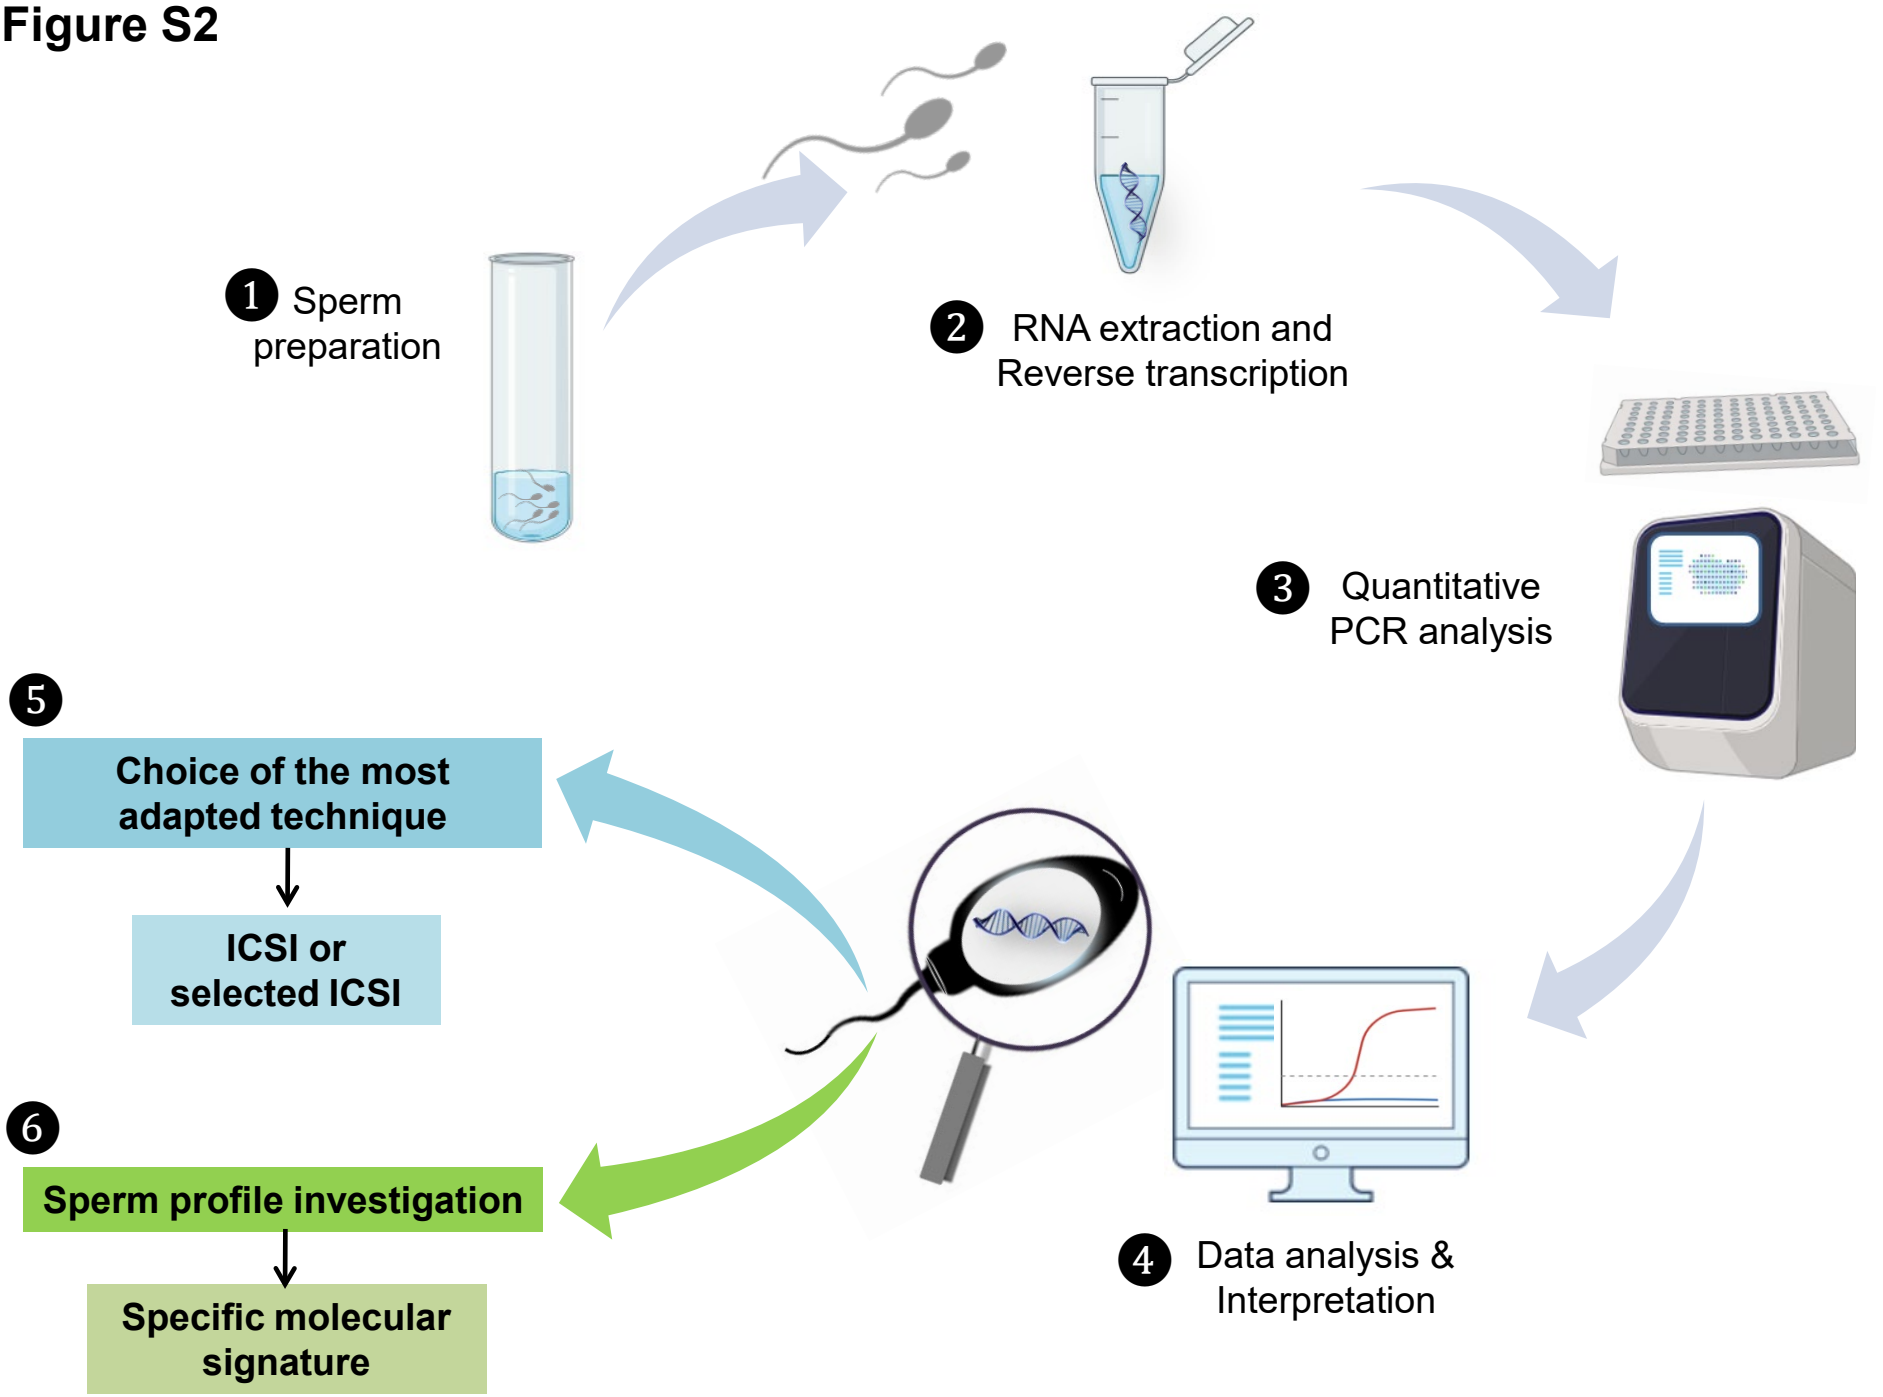

Supplement: f1 [file 1434546.f1.zip]
